# Supplementary material for: Development of a Caffeine Content Table for Foods, Drinks, Medications and Supplements Typically Consumed by the Brazilian Population
Source: MDPI journal article supplement (doi:10.3390/nu14204417), 2022-10-21
Supplement: s1 [file s1]

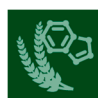

**Supplementary Table S1.** Tabela Brasileira de Teor de Cafeína (BraCaffT).

| Alimentos                                                       | Cafeína<br>(mg/100<br>g ou<br>ml) | DP<br>(mg) | CV<br>(%) | Min.<br>(mg/100g ou<br>ml) | Máx.<br>(mg/100g ou<br>ml) | Porção<br>(mg/ por<br>unidade) | Medida Caseira <sup>€</sup><br>(unidade) |
|-----------------------------------------------------------------|-----------------------------------|------------|-----------|----------------------------|----------------------------|--------------------------------|------------------------------------------|
| <b><u>Café<sup>‡</sup></u></b>                                  |                                   |            |           |                            |                            |                                |                                          |
| Café Coado, Arábica                                             | 30                                | 13         | 41        | 11                         | 54                         | 45                             | 1 xícara de café (150 ml)                |
| Café em pó, Arábica                                             | 1165                              | 163        | 14        | 1050                       | 1280                       | 117                            | 1 colher de sopa (10 g)                  |
| Café em pó, Blend                                               | 1444                              | 283        | 20        | 1270                       | 1770                       | 144                            | 1 colher de sopa (10 g)                  |
| Café Espresso                                                   | 279                               | 144        | 52        | 177                        | 380                        | 112                            | 1 xícara de espresso (40 ml)             |
| Café em Cápsula                                                 | 64                                | 30         | 47        | 30                         | 125                        | 64                             | 1 cápsula (6 g)                          |
| Café Instantâneo (Solúvel), em pó                               | 3344                              | -          | -         | -                          | -                          | 67                             | 1 colher de café (2 g)                   |
| Café Instantâneo (Solúvel), diluído                             | 36                                | 14         | 39        | 20                         | 45                         | 54                             | 1 xícara de café (150 ml)                |
| Café Descafeinado Coado                                         | 2                                 | -          | -         | -                          | -                          | 3                              | 1 xícara de café (150 ml)                |
| Café Descafeinado em Cápsula , Nespresso                        | 3                                 | -          | -         | -                          | -                          | -                              | 1 cápsula (6 g)                          |
| Café Descafeinado Instantâneo (Solúvel), diluído                | 1                                 | 1          | 106       | 0                          | 2                          | 2                              | 1 cápsula (150 ml)                       |
| Café do tipo Frappuccino, Starbucks                             | 25                                | 2          | 9         | 23                         | 26                         | 88                             | 1 copo grande (350 ml)                   |
| Café do tipo Cappuccino                                         | 32                                | 6          | 18        | 28                         | 36                         | 48                             | 1 xícara de café (150 ml)                |
| Café Coado, Arábica com leite (80% café : 20% leite)            | 24                                | -          | -         | 9                          | 43                         | 48                             | 1 xícara (200 ml)                        |
| Café Coado , Arábica com leite (50% café : 50% leite)           | 15                                | -          | -         | 5                          | 27                         | 30                             | 1 xícara (200 ml)                        |
| Café Coado , Arábica com leite – Pingado (20% café : 80% leite) | 6                                 | -          | -         | 2                          | 11                         | 12                             | 1 xícara (200 ml)                        |
| <b><u>Chás e Infusões<sup>‡</sup></u></b>                       |                                   |            |           |                            |                            |                                |                                          |
| Chá Verde, infusão                                              | 20                                | 2          | 12        | 17                         | 21                         | 40                             | 1 xícara de chá (200 ml)                 |
| Chá Preto, infusão (English breakfast; Earl Grey)               | 18                                | 5          | 30        | 12                         | 32                         | 36                             | 1 xícara de chá (200 ml)                 |
| Chá Mate, infusão                                               | 5                                 | 2          | 47        | 3                          | 6                          | 10                             | 1 xícara de chá (200 ml)                 |
| Chimarrão                                                       | 26                                | 15         | 58        | 14                         | 52                         | 91                             | 1 cuia de chimarrão (350 ml)             |

|                                             |                |                |               |             |             |               |                                 |
|---------------------------------------------|----------------|----------------|---------------|-------------|-------------|---------------|---------------------------------|
| Tereré                                      | 24             | 12             | 45            | 17          | 36          | 84            | 1 cuia de tereré (350 ml)       |
| Chá vermelho, infusão                       | 16             | -              | -             | -           | -           | 32            | 1 xícara de chá (200 ml)        |
| Ice Tea (Chá Gelado)                        | 6              | 1              | 18            | 4           | 7           | 18            | 1 garrafa P (300 ml)            |
| <b><u>Cacau</u></b>                         |                |                |               |             |             |               |                                 |
| Cacau, em pó                                | 230            | -              | -             | -           | -           | 23            | 1 colher de sopa (10 g)         |
| <b><u>Chocolate</u></b>                     |                |                |               |             |             |               |                                 |
| Chocolate ao Leite                          | 19             | -              | -             | -           | -           | 9             | 1/2 barra (45 g)                |
| Chocolate Meio Amargo                       | 70             | -              | -             | -           | -           | 32            | 1/2 barra (45 g)                |
| Chocolate Amargo                            | 114            | -              | -             | -           | -           | 51            | 1/2 barra (45 g)                |
| <b><u>Bebidas com Cacau</u></b>             |                |                |               |             |             |               |                                 |
| Bebidas com Cacau*                          | 3              | 2              | 58            | 2           | 6           | 6             | 1 xícara (200 ml)               |
| <b><u>Sobremesas</u></b>                    |                |                |               |             |             |               |                                 |
| Pudim de Café                               | 22             | 8              | 36            | -           | -           | 22            | 1 taça de sobremesa (100 ml)    |
| Bolo de Café                                | 35             | 38             | 110           | 6           | 78          | 21            | 1 fatia (60 g)                  |
| Brigadeiro de Café                          | 39             | 16             | 42            | 28          | 57          | 20            | 1/2 taça de sobremesa (50 ml)   |
| Mousse de Café                              | 67             | 27             | 40            | 48          | 98          | 67            | 1 taça de sobremesa (100 ml)    |
| Tiramisu                                    | 9              | 4              | 38            | 7           | 13          | 4             | 1 fatia (45 g)                  |
| Pudim de Chocolate                          | 10             | 3              | 30            | 7           | 13          | 10            | 1 taça de sobremesa (100 ml)    |
| Mousse de Chocolate                         | 13             | 12             | 91            | 6           | 27          | 13            | 1 taça de sobremesa (100 ml)    |
| Brownie                                     | 18             | 10             | 59            | 11          | 29          | 8             | 1 fatia (45 g)                  |
| Bolo de Chocolate                           | 9              | 2              | 29            | 7           | 11          | 5             | 1 fatia (60 g)                  |
| Brigadeiro com Chocolate em pó              | 9              | 2              | 22            | 7           | 11          | 5             | 1/2 taça de sobremesa (50 ml)   |
| Brigadeiro com Cacau                        | 9              | 3              | 35            | 5           | 11          | 5             | 1/2 taça de sobremesa (50 ml)   |
| Brigadeiro com Achocolatado                 | 3              | 0              | 4             | 3           | 3           | 2             | 1/2 taça de sobremesa (50 ml)   |
| <b><u>Refrigerante</u></b>                  |                |                |               |             |             |               |                                 |
| Refrigerante de Guaraná                     | 1              | -              | -             | -           | -           | 4             | 1 lata (350 ml)                 |
| Refrigerante de Cola                        | 9              | 1              | 9             | 8           | 10          | 32            | 1 lata (350 ml)                 |
| <b><u>Bebida Energética/ Energético</u></b> |                |                |               |             |             |               |                                 |
| Bebida Energética/ Energético**             | 30             | 3              | 10            | 24          | 34          | 75            | 1 lata (250 ml)                 |
| <b><u>Guaraná</u></b>                       |                |                |               |             |             |               |                                 |
| Guaraná, em pó                              | 3044           | 1380           | 45            | 2068        | 4020        | 61            | 1 colher de café (2 g)          |
| <b><u>Suplementos Alimentares</u></b>       | <b>Cafeína</b> | <b>DP (mg)</b> | <b>CV (%)</b> | <b>Min.</b> | <b>Máx.</b> | <b>Porção</b> | <b>Medida Caseira (unidade)</b> |

|                                           | (mg/100g<br>ou ml)             |                    |                   | (mg/100g ou<br>ml)           | (mg/100g ou<br>ml)           | (mg/ por<br>unidade) |                                   |
|-------------------------------------------|--------------------------------|--------------------|-------------------|------------------------------|------------------------------|----------------------|-----------------------------------|
| Cafeína (anidra)‡                         | 200                            | -                  | -                 | -                            | -                            | N.A.                 | N.A.                              |
| Barra Energética com Cafeína<br>***       | 233                            | 98                 | 42                | 130                          | 375                          | 82                   | 1 barra (35 g)                    |
| Gel Energético com Cafeína<br>****        | 167                            | -                  | -                 | -                            | -                            | 70                   | 1 sachê (30 ml)                   |
| Suplemento Proteico com<br>Cafeína, em pó | 347                            | 87                 | 25                | 286                          | 409                          | 104                  | 1 dosador (30 g)                  |
| Suplemento Pré-Treino, em pó              | 3620                           | 1012               | 28                | 2800                         | 4878                         | 181                  | 1 colher de chá/<br>dosador (5 g) |
| Suplemento Termogênico, em<br>pó          | 900                            | 196                | 22                | 670                          | 1200                         | 45                   | 1 colher de chá/<br>dosador (5 g) |
| Suplemento Termogênico<br>(concentrado)‡  | 420                            | -                  | -                 | -                            | -                            | N.A.                 | N.A.                              |
| Suplemento Termogênico‡                   | 154                            | 33                 | 21                | 125                          | 200                          | N.A.                 | N.A.                              |
| <b>Medicações‡</b>                        | <b>Cafeína<br/>(mg/porção)</b> | <b>DP<br/>(mg)</b> | <b>CV<br/>(%)</b> | <b>Min. (mg/<br/>porção)</b> | <b>Máx. (mg/<br/>porção)</b> | N.A.                 | N.A.                              |
| Anti-inflamatório                         | 50                             | -                  | -                 | -                            | -                            | -                    | -                                 |
| Miorrelaxante A                           | 50                             | -                  | -                 | -                            | -                            | -                    | -                                 |
| Miorrelaxante B                           | 30                             | -                  | -                 | -                            | -                            | -                    | -                                 |
| Analgésico C                              | 100                            | -                  | -                 | -                            | -                            | -                    | -                                 |
| Analgésico D                              | 65                             | -                  | -                 | -                            | -                            | -                    | -                                 |
| Analgésico E                              | 30                             | -                  | -                 | -                            | -                            | -                    | -                                 |

DP: desvio padrão; CV: coeficiente de variação; Mín: menor teor observado; Máx: maior teor observado. ‡: Os itens da categoria Café e os itens da categoria Chá e Infusões representam bebidas prontas para beber, com exceção de três itens apresentados em pó: Café em pó, Arábica; Café em pó, Blend e Café Instantâneo (solúvel), em pó. \*: Chocolate ao leite e chocolate quente; \*\*: Red Bull (Fuschl am See, Salzburgo, Áustria); Red Bull Sugar Free (Fuschl am See, Salzburgo, Áustria); Monster (Weston, Massachusetts, EUA); Monster Sugar Free (Weston, Massachusetts, EUA). \*\*\*: Barra Energética Kimera Café com Chocolate (Iridium Labs, São Paulo, São Paulo, Brasil); Barra de Proteína Whey Grego Coffee Cream (Nutra, Xaxim, Santa Catarina, Brasil); Extreme Bar (GoldNutrition, Lisboa, Lisboa, Portugal); Barra Energética Caramelo Salteado (Dobro, Moema, São Paulo, Brasil); Barra Energética MINI Canela Mooca (Dobro, Moema, São Paulo, Brasil). \*\*\*\*: Go! Energy Gel Caffeine (Athletica Nutrition, Matão, São Paulo, Brasil); VO2 Gel X-Caffeine (Integralmédica, Embu Guaçu, São Paulo, Brasil). †: Porção: 1 cápsula, pílula ou drácea. A: Dorflex, Miorrelax, Nevralgex, Fenaflex ODC, Dorilax, Benoflex P, Doricin, Ana-flex, Novralflex, Relaflex, Sedalex. B: Tandene; Tanderalgina; Miosan caf. C: Cefaliv; Enxak; Migraliv. D: Cefadrin; Sonridor caf; Tylenol DC; Cafiaspirina; Tylalgin CAF; Doril enxaqueca. E: Neosaldina, Benegrip, Coristina D, Doralgina, Melhoral, Sedamed, Doril, Calmador, Gripinew. ‡: As medidas caseiras para suplementos alimentares, refrigerantes e bebidas energéticas foram baseadas nas informações dos rótulos dos produtos, enquanto as medidas de alimentos e receitas foram estipuladas de acordo com o manual fotográfico de alimentos GloboDiet [1]. N.A.: Não aplicável.

## References

1. Crispim, S.P.; Fisberg, S.P. *Manual Fotográfico de Quantificação Alimentar*, 1st ed.; Universidade Federal do Paraná: Curitiba, Brazil, 2017; pp. 1–147. ISBN 9788568566084.
